# Supplementary material
Source: publisher figshare collection journal article supplement (https://karger.figshare.com/ndownloader/files/30807103)
Supplement: Supplementary file 1 [file 30807103]

Table 2S: Predefined baseline confounding factors and co-interventions

| age of participants |
| --- |
| age of donor |
| Sex |
| cardiovascular disease |
| overweight |
| performance status |
| Immunsuppression (Medication) |
| postoperative renal insufficiency |
| cellular rejection |
| wall thickness of urinary bladder |
| preoperative urinary bladder volume |
| previous operations |
| Stenting |
| Cold/ warm ischemia time |
